# Supplementary material for: Stabilization of hESCs in two distinct substates along the continuum of pluripotency
Source: PubMed Central journal article supplement — iScience. 2022 Nov 2;25(12):105469. doi: 10.1016/j.isci.2022.105469 (PMC9668692; doi:10.1016/j.isci.2022.105469), 2022-11-02
Supplement: mmc1.pdf [file mmc1.pdf]

iScience, Volume 25

## **Supplemental information**

### **Stabilization of hESCs in two distinct substates along the continuum of pluripotency**

**Chen Dekel, Robert Morey, Jacob Hanna, Louise C. Laurent, Dalit Ben-Yosef, and Hadar Amir**

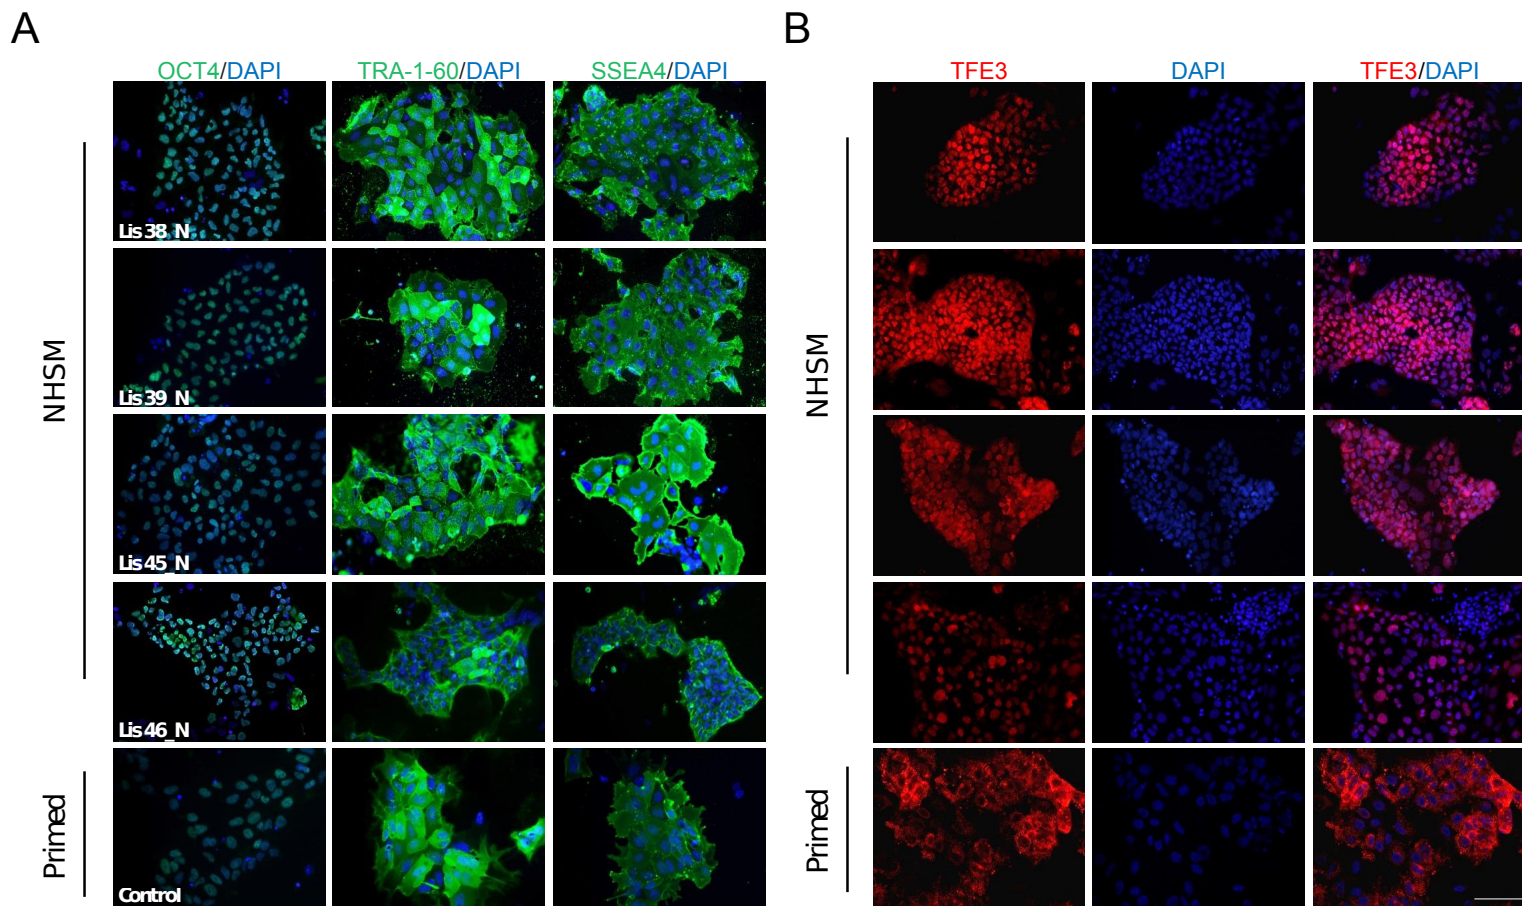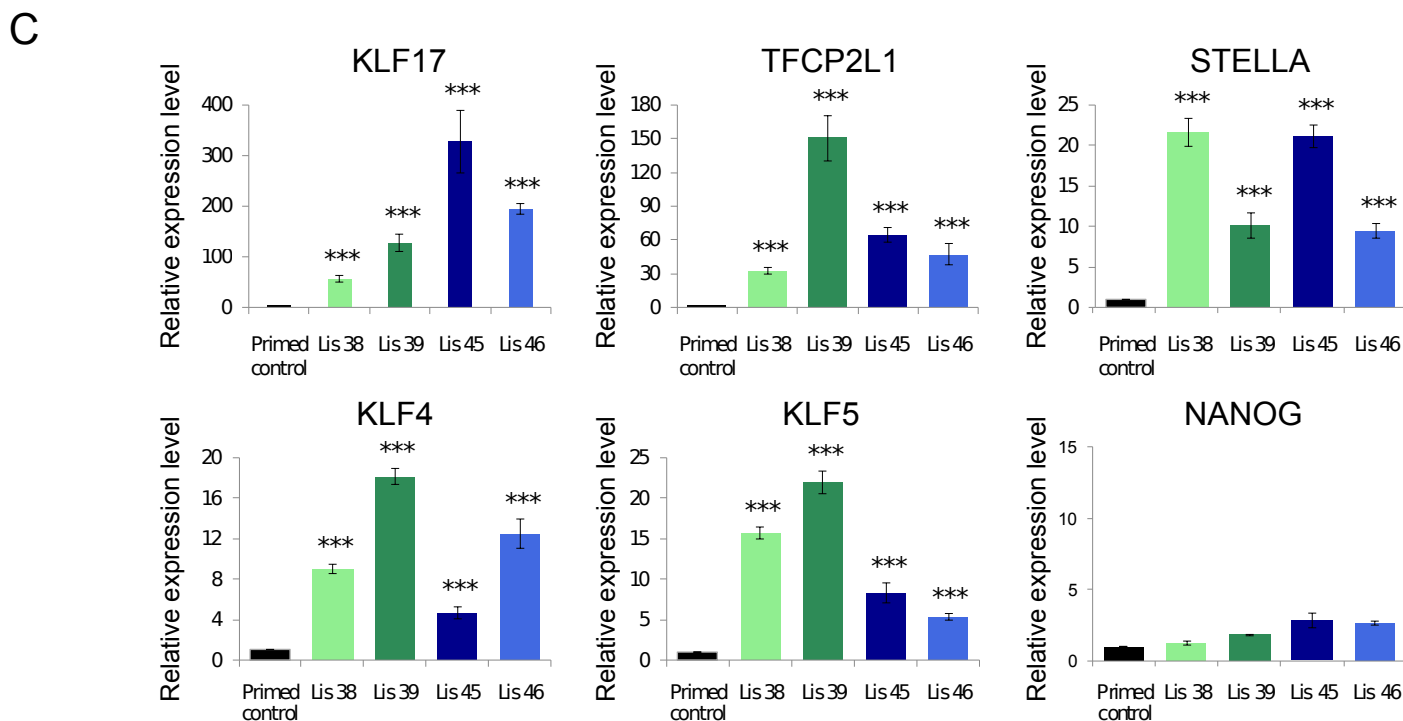

**Figure S1:** Characterization of NHSM derived hESC lines - related to Figure 1

(A) Immunofluorescence staining for pluripotency markers, OCT4, TRA-1-60 and SSEA4 (A) and the naive marker TFE3 (B) in the NHSM derived and primed control hESC lines (scale bar-100  $\mu$ m). (C) Relative mRNA expression levels of the naive markers KLF17, TFCEP2L1, STELLA, KLF5, and KLF4 and a pluripotency marker (NANOG) as determined by qRT-PCR in NHSM (red columns) at p20 (derivation) and primed control (gray column) hESC cultures. All data are expressed as mean  $\pm$  SEM, \*\*\* $p < .005$  by one sample t-test.

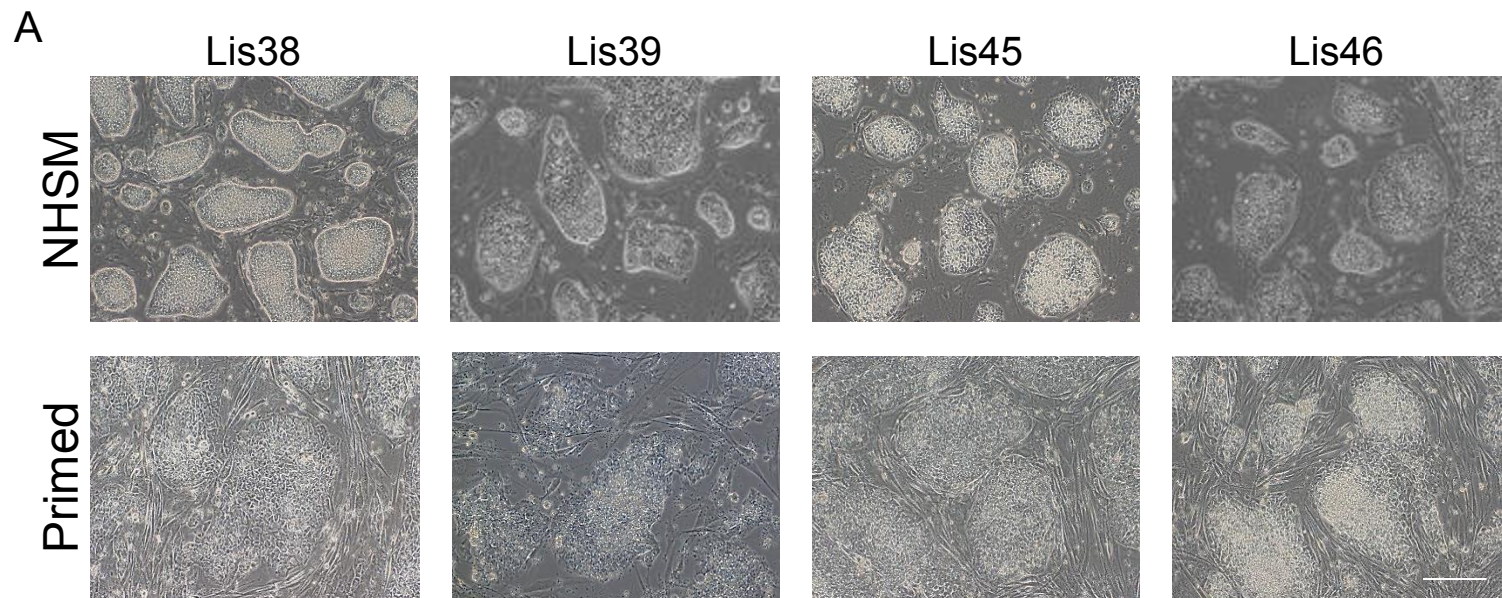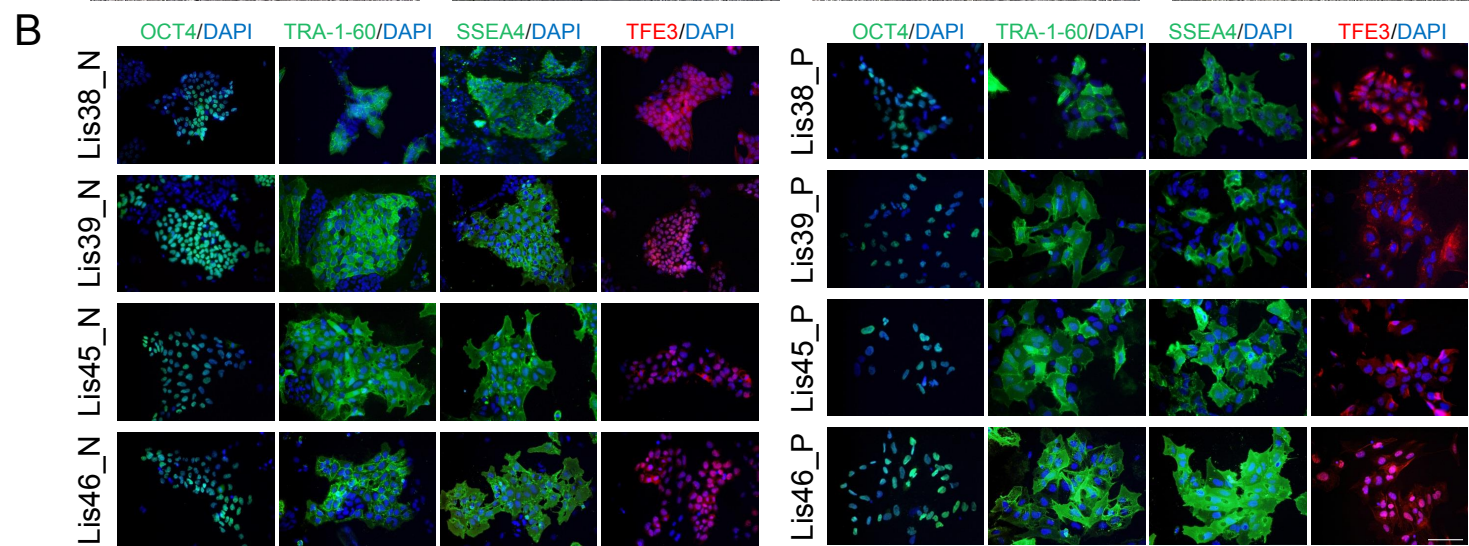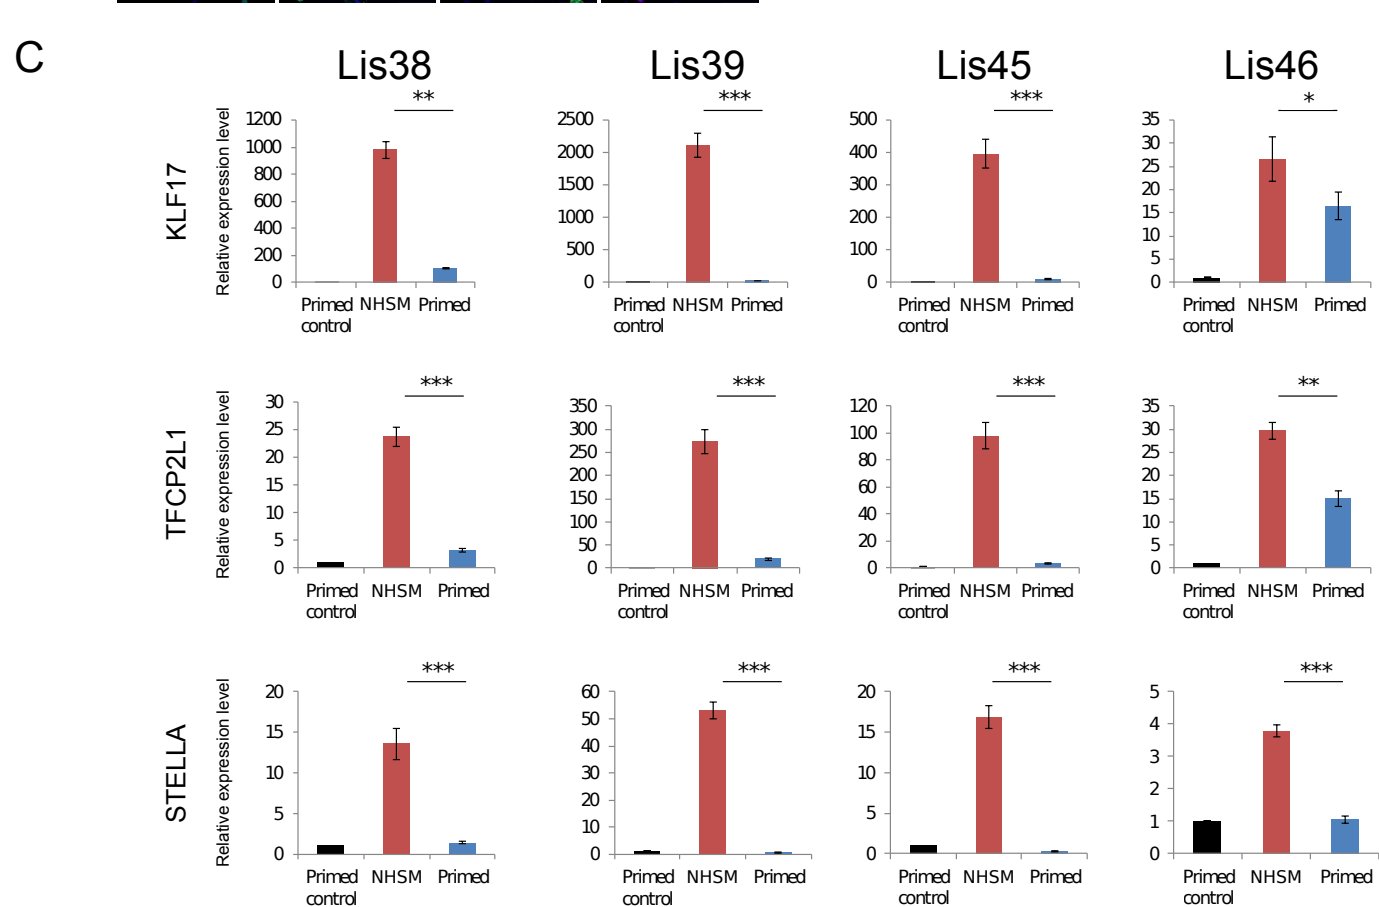

**Figure S2:** Validation of substates at early passage after conversion – related to Figure 1

(A) Colony morphology of early passage (p30, Early NHSM, top row) and their early passage isogenic primed counterparts (p30, Early primed, bottom row; scale bar-200  $\mu$ m).

(B) Immunofluorescence staining for pluripotent markers, OCT4, TRA-1-60 and SSEA4 and for the naïve marker TFE3 in Early NHSM (top 4 rows) and isogenic Early primed (bottom 4 rows) hESC cultures (scale bar-100  $\mu$ m).

(C) Relative mRNA expression levels of naïve markers KLF17, TFCEP2L1 and STELLA as determined by qRT-PCR in Early NHSM (red column) and Early primed (blue column) cultures, relative to primed control (black column). All data are expressed as mean  $\pm$  SEM, \* $p < .05$ , \*\* $p < .01$ , \*\*\* $p < .005$  by paired t-test.

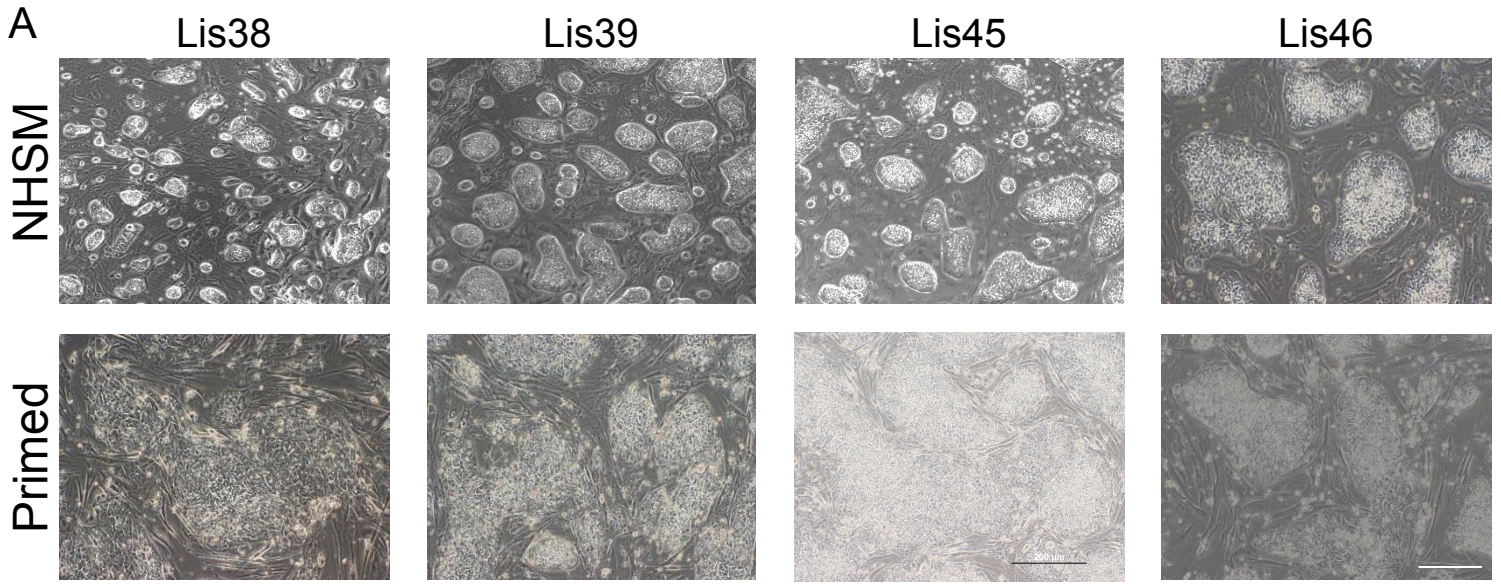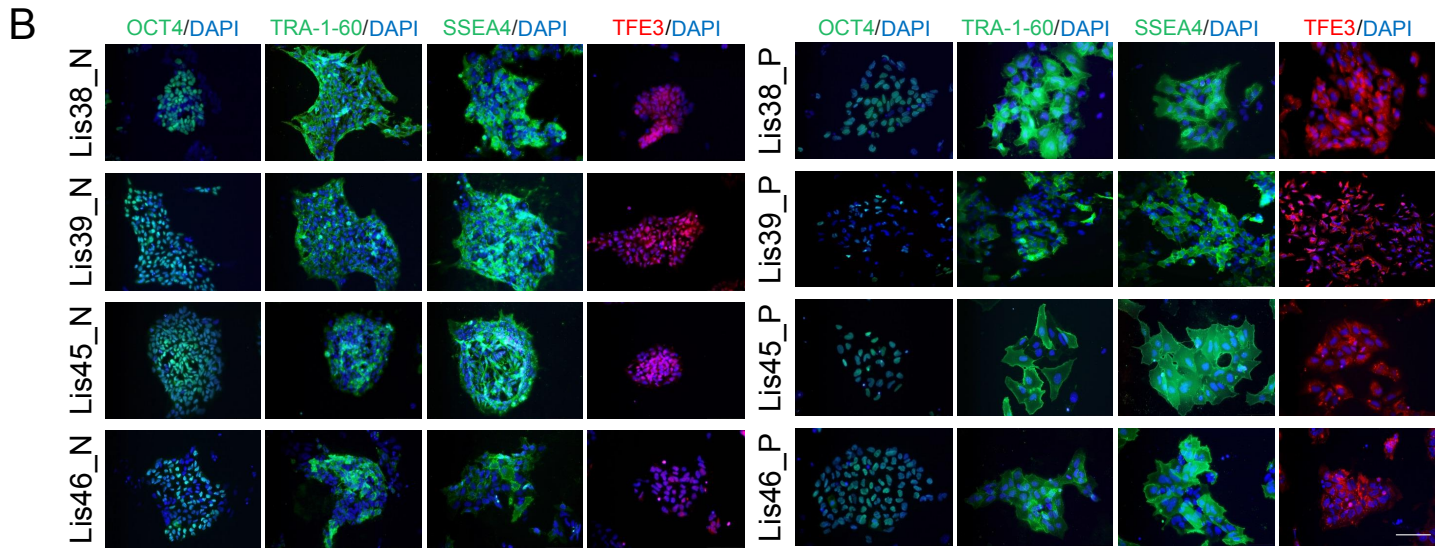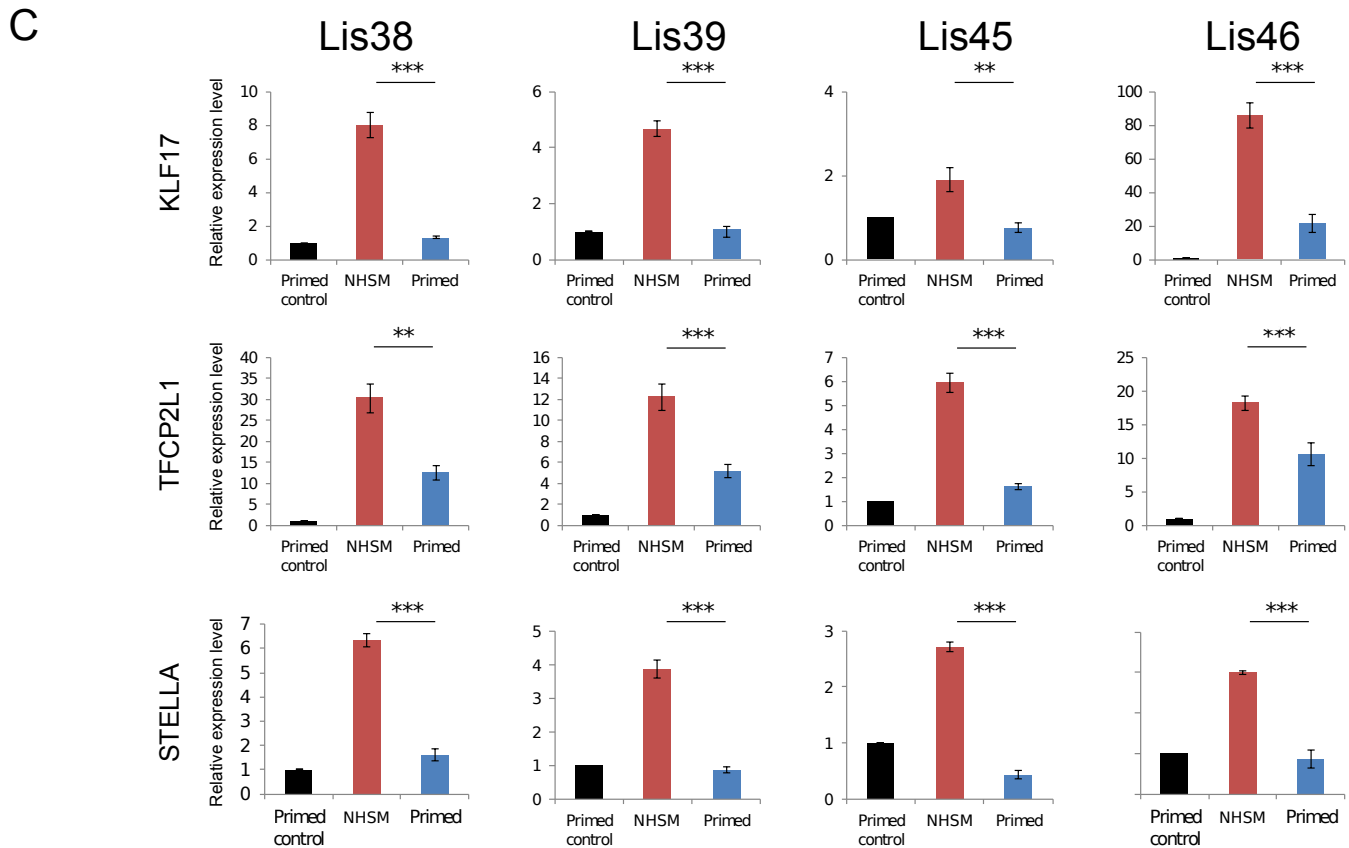

**Figure S3:** Analyzing the substates of hESC lines after prolonged culture – related to Figure 1

(A) Colony morphology of p50 Late NHSM (top row) and isogenic Late primed (bottom row) hESC cultures (scale bar-200  $\mu$ m). (B) Immunofluorescence staining for pluripotency markers, OCT4, TRA-1-60 and SSEA4 and for the naïve marker TFE3 in NHSM and isogenic primed hESCs (scale bar-100  $\mu$ m). (C) Relative mRNA expression levels of the naïve markers KLF17, TFCEP2L1 and STELLA as determined by qRT-PCR in Late NHSM (red column) and Late primed (blue column) hESC cultures, relative to primed control cultures (black column). All data are expressed as mean  $\pm$  SEM, \* $p < .05$ , \*\* $p < .01$ , \*\*\* $p < .005$  by paired t-test.

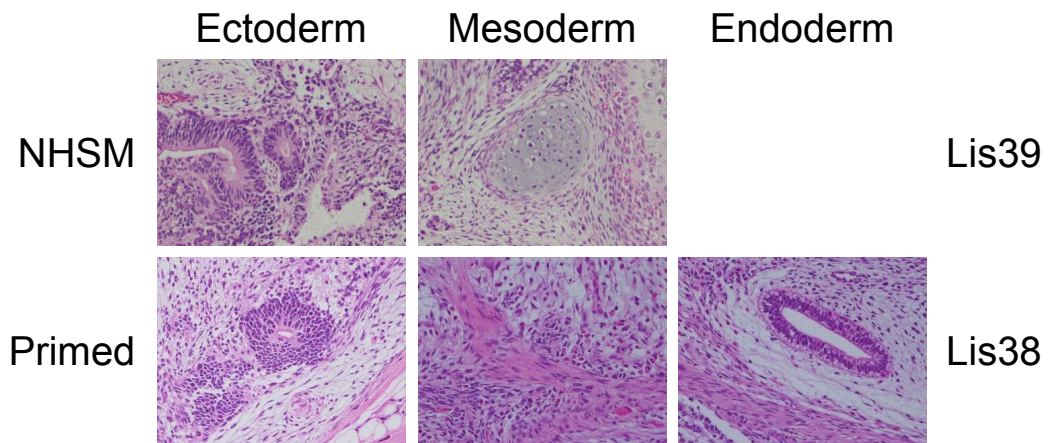

**Figure S4:** Differentiation potential of NHSM and isogenic primed hESC - related to Figure 1

In vivo differentiation was demonstrated by teratoma formation at p40. Tissues representing the three germ layers were identified using hematoxylin and eosin staining and marked by white arrows (scale bar 50  $\mu$ m).

A

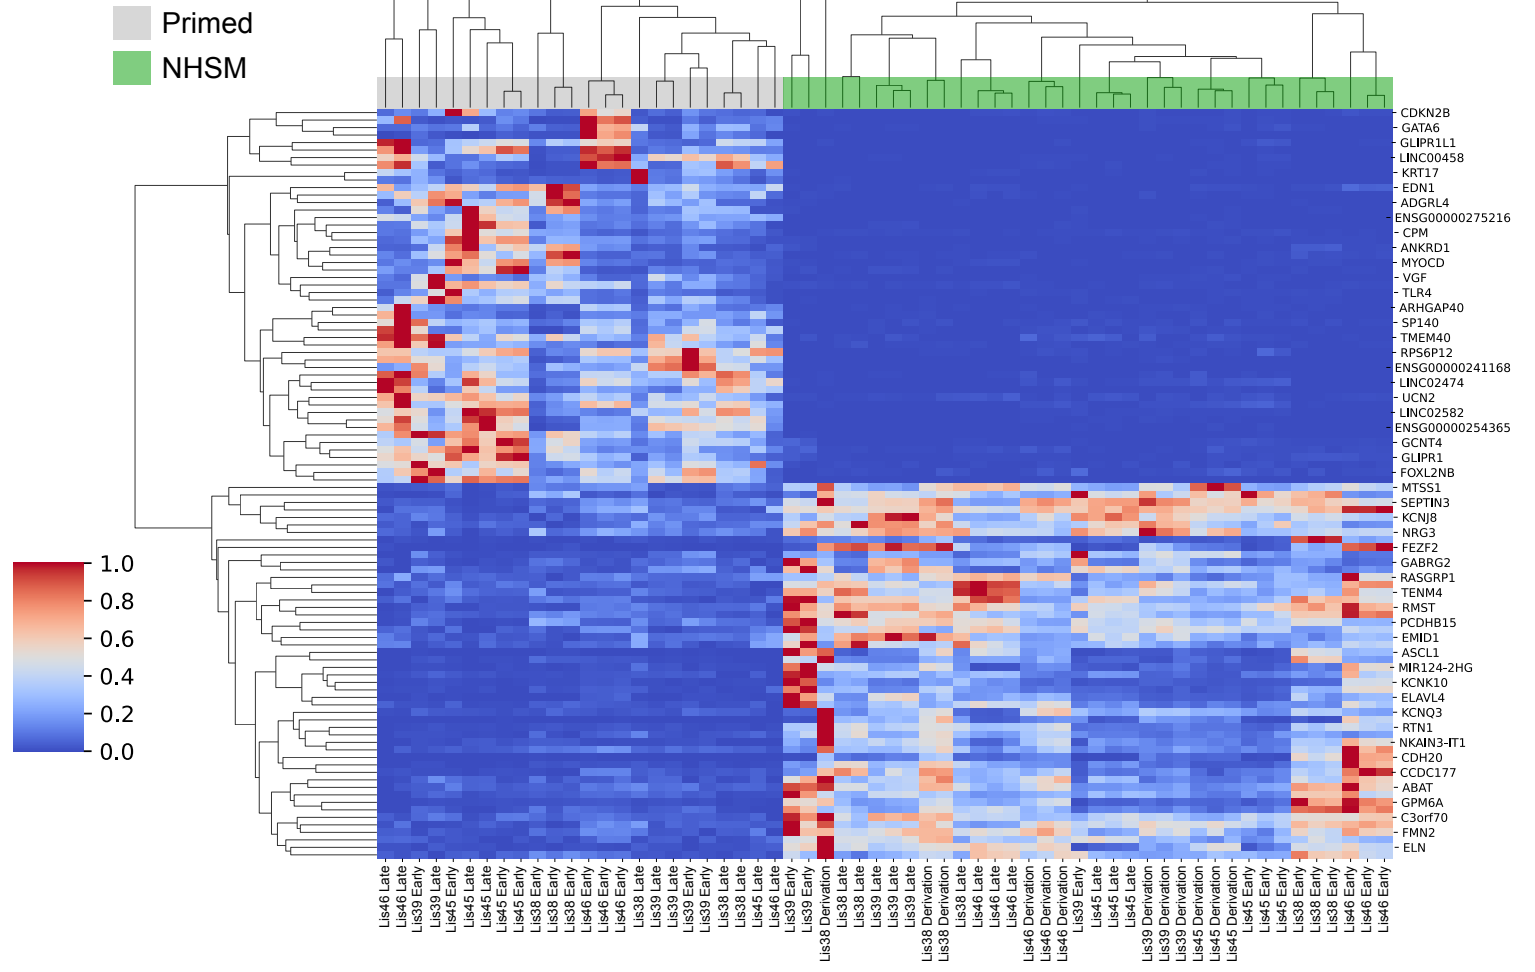

B

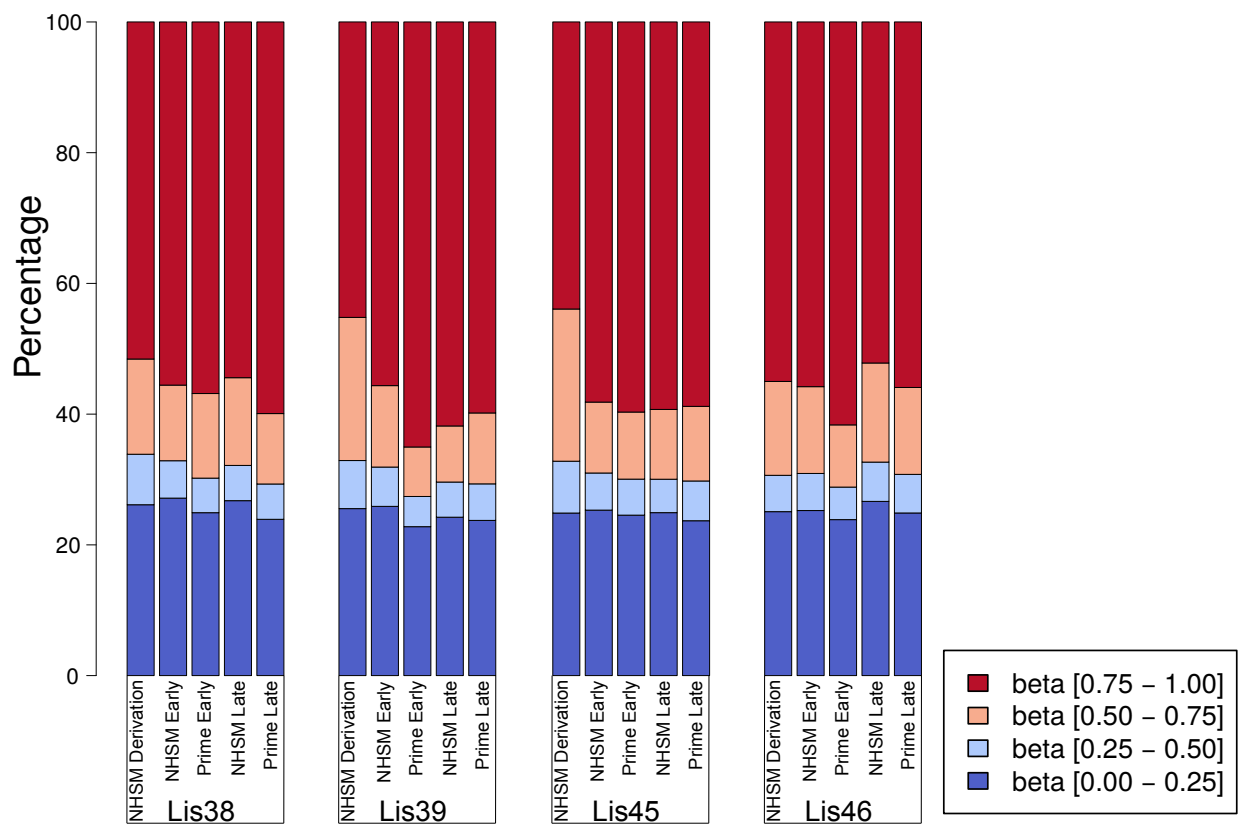



**Figure S5:** Transcriptomic and epigenomic characterization of our NHSM and primed cultures – related to Figure 3

(A) Heatmap displaying the top 100 differentially expressed genes by fold change (50 upregulated in NHSM vs 50 upregulated in primed). (B) Global methylation levels from EPIC DNA methylation array. One sample from each line at each condition and timepoint. Methylation levels are displayed as a percentage of four beta value bins (Beta values range from 0 to 1 and are used to measure the percentage of methylation. They are the ratio of the methylated probe intensity and the overall intensity (sum of methylated and unmethylated probe intensities)).

Lis45

Lis46

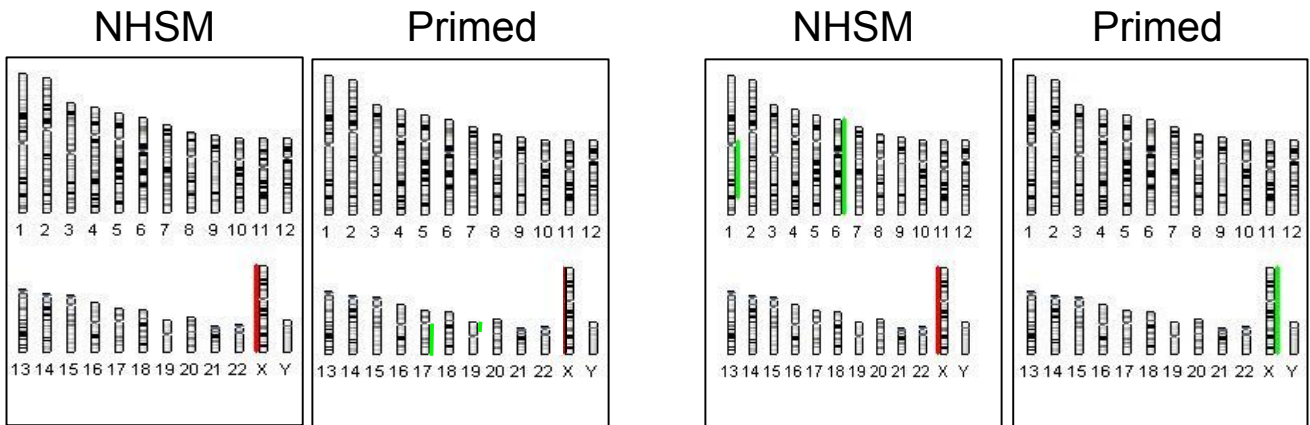

**Figure S6:** Chromosomal locations of copy number aberrations detected using CMA - related to Figure 2

Chromosomal charts of the CMA aberrations detected in late NHSM and isogenic primed cells. Duplications are shown in green and deletions in red.

**A**

**Lis38**

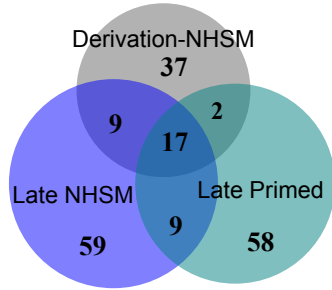

**Lis39**

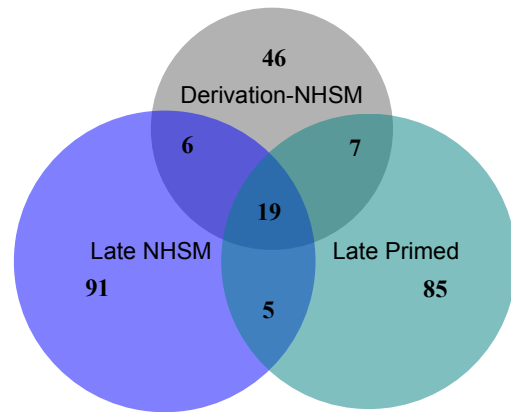

**Lis45**

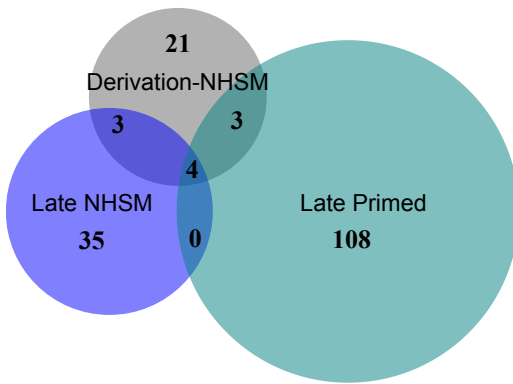

**Lis46**

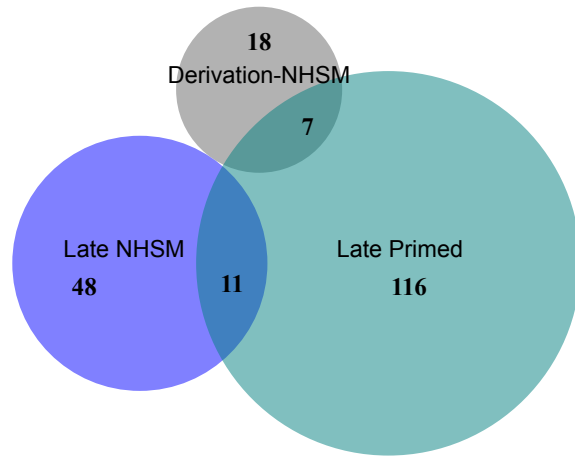

**B**

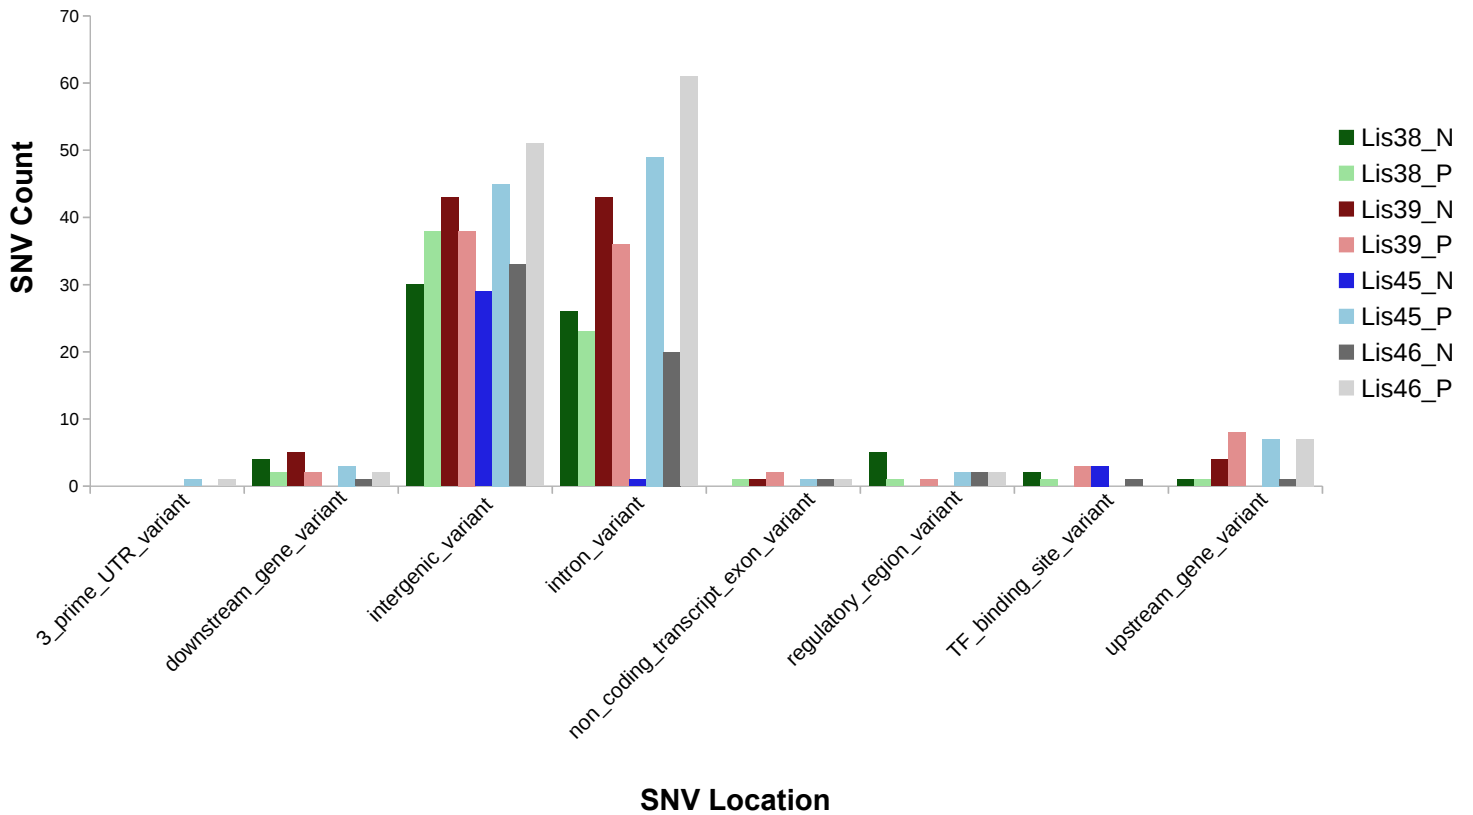

**Figure S7:** SNVs in NHSM derived compared to isogenic primed hESCs - related to Figure 4

(A) Venn-diagrams presenting the number of SNVs detected in NHSM derived hESCs, as well as in late NHSM and isogenic primed cells, including unique and overlapping SNVs. (B) Bar graph showing the distribution of the detected SNVs throughout the genome for each line in non-coding regions, including: SNVs within introns, up-stream or down-stream to genes, non-coding transcript exons, TF binding sites, regulatory regions, and intergenic regions.

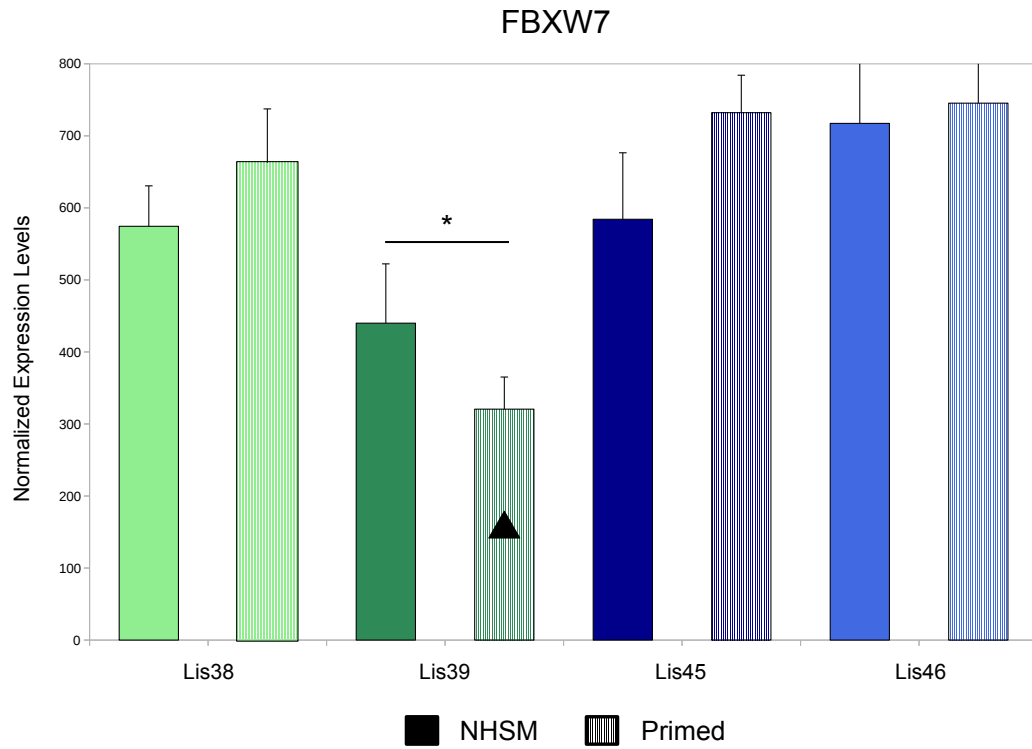

**Figure S8:** Aberrations in cancer-associated genes (Tier1 genes) - related to Figure 4

A deletion upstream to FBXW7 gene detected in Lis39\_P (marked by a black triangle) is associated with decreased expression levels compared to its NHSM counterpart, in contrast to the expression pattern observed in the other lines. Data are expressed as mean  $\pm$  SD, \* $p < .05$  by paired t-test.

A

**Name and Proportion of the Biological Process**

- Various Development Terms, 41.9%
- Regulation of BMP Signaling Pathway, 14.8%
- Regulation Cell Differentiation, 13.9%
- Regulation of Steroid Biosynthetic Process, 11.2%
- Regulation of Endothelial Cell Migration, 9.9%
- Positive Regulation of Endothelial Cell Proliferation, 4.6%
- Cell-Cell Adhesion via Plasma-Membrane, 3.6%

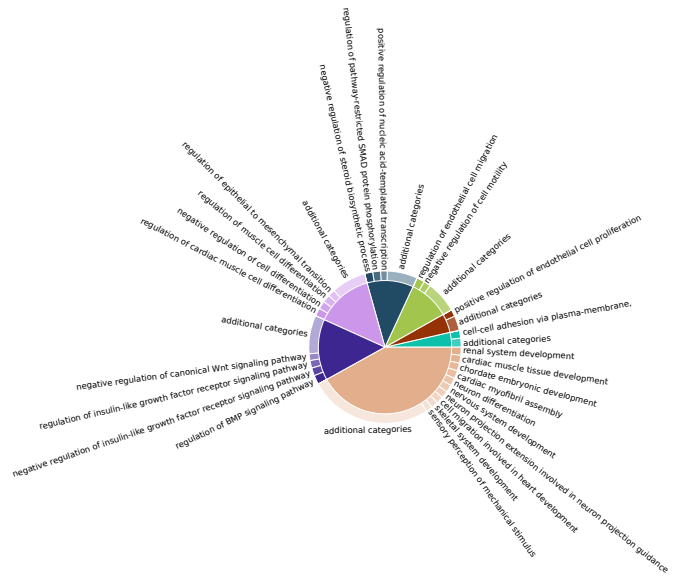

B

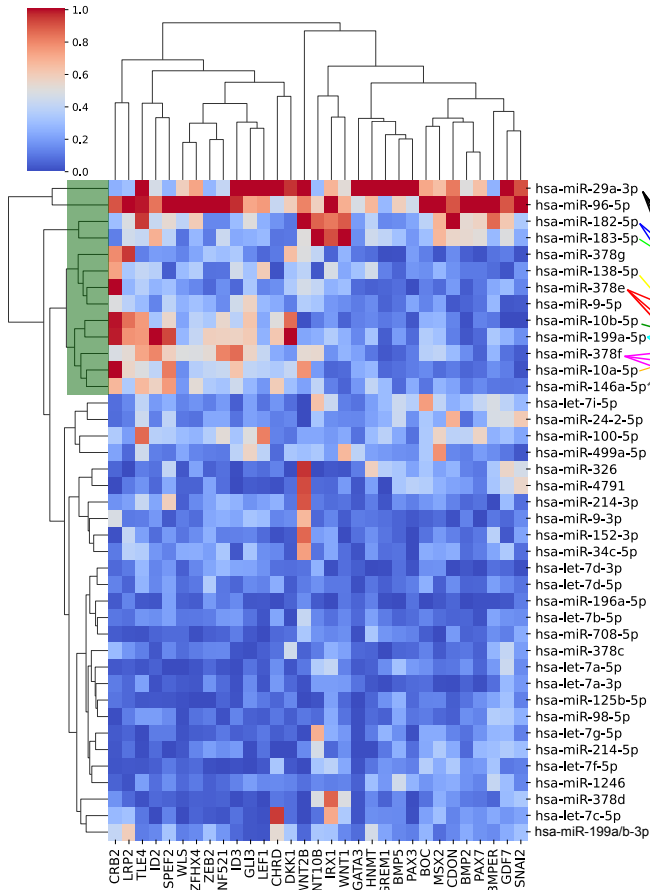

■ miRNA's analyzed for pathway enrichment

| KEGG 2021 Term                                           | Adjusted P-value |
|----------------------------------------------------------|------------------|
| Hippo signaling pathway                                  | 1.53E-12         |
| TGF-beta signaling pathway                               | 1.98E-09         |
| Basal cell carcinoma                                     | 7.24E-09         |
| Wnt signaling pathway                                    | 1.90E-06         |
| Hedgehog signaling pathway                               | 1.34E-05         |
| Signaling pathways regulating pluripotency of stem cells | 1.74E-05         |

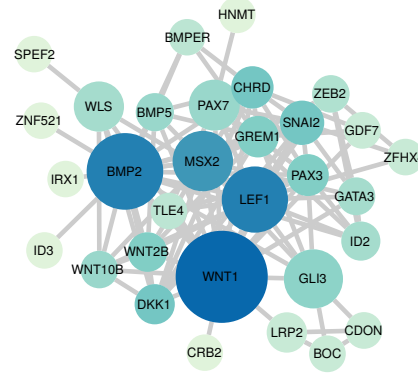

C

■ miRNA's analyzed for pathway enrichment

| KEGG 2021 Term                                           | Adjusted P-value |
|----------------------------------------------------------|------------------|
| Signaling pathways regulating pluripotency of stem cells | 1.66E-05         |
| Pathways in cancer                                       | 4.69E-03         |
| Proteoglycans in cancer                                  | 1.89E-02         |
| Chemical carcinogenesis                                  | 2.19E-02         |
| Melanoma                                                 | 2.25E-02         |
| Cytokine-cytokine receptor interaction                   | 2.65E-02         |
| TGF-beta signaling pathway                               | 2.71E-02         |
| PI3K-Akt signaling pathway                               | 3.30E-02         |

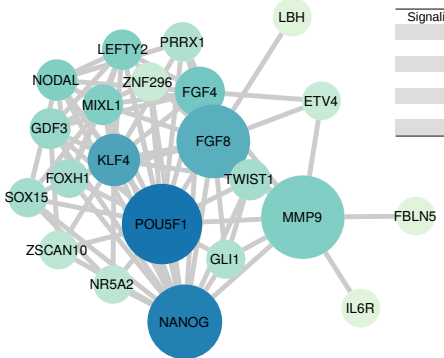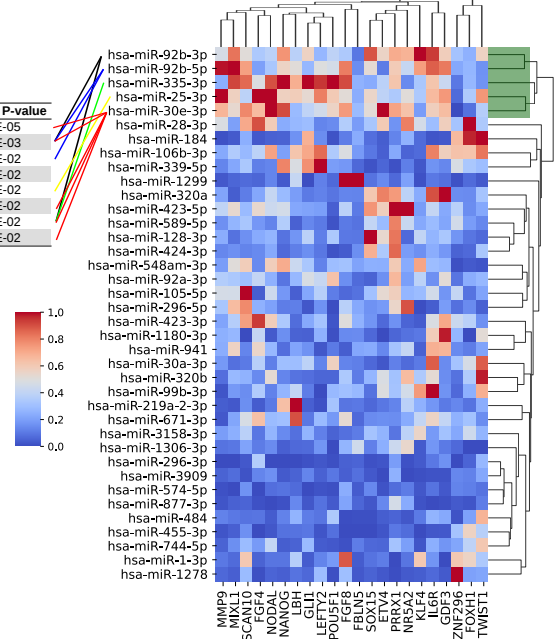

D

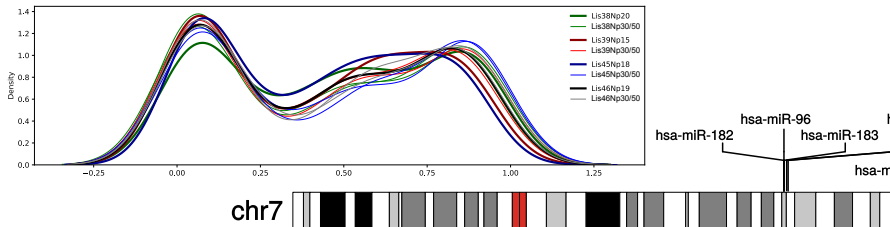

**Figure S9:** Effects of long-term culture on the transcriptome of NHSM hESCs – related to Figure 5

(A) Gene ontology (GO) enrichment analysis of uniquely downregulated genes in the NHSM derivation (p20) timepoint compared to the early (p30) and late (p50) timepoints among cultures. Genes that were downregulated in the early primed vs late primed timepoint were removed leaving 157 genes (**Table S7**). Revigo and CirGO were used to provide a non-redundant and biologically succinct visualization of GO terms with an adjusted p-value < 0.05. (B) Combined mRNA and miRNA expression analysis to identify regulatory changes occurring over time in NHSM conditions. The network (right) was constructed by creating STRING protein to protein interaction networks and then clustering the networks. The network shows the largest cluster of mRNAs downregulated in NHSM derived (p20) cultures compared to early (p30) and late (p50) NHSM cultures with the size relative to the Betweenness Centrality score and the color representing the node degree. The heatmap (left) was created using the importance scores generated by integrating the miRNA and mRNA using a gene regulatory inference algorithm. The colors represent the importance scores which reflect the degree to which each potential mRNA target is regulated by each miRNA in the dataset (see methods). The heatmap shows the mRNAs downregulated in the NHSM derived cultures that were also found in the largest clustered network (right). The table shows the significant (adj. p-value < 0.00005) KEGG 2021 pathways enriched in the mRNAs in the largest clustered network. The lines drawn from the miRNAs in the heatmap to the pathways in the table, indicate the pathways predicted to be regulated by the corresponding miRNAs by miRPathDB. Only the miRNAs highlighted in green were analyzed. (C) Combined mRNA and miRNA expression analysis to identify regulatory changes occurring over time in NHSM conditions. The network (left) was constructed by creating STRING protein to protein interaction networks and then clustering the networks. The network shows the largest cluster of mRNAs upregulated in NHSM derived (p20) cultures compared to early (p30) and late (p50) NHSM cultures with the size relative to the Betweenness Centrality score and the color representing the node degree. The heatmap (right) was created using the importance scores generated by integrating the miRNA and mRNA using a gene regulatory inference algorithm. The colors represent the importance scores which reflect the degree to which each potential mRNA target is regulated by each miRNA in the dataset (see methods). The heatmap shows the mRNAs upregulated in the NHSM derived cultures that were also found in the largest clustered network (right). The table shows the significant (adj. p-value < 0.05) KEGG 2021 pathways enriched in the mRNAs in the largest clustered network. The lines drawn from the miRNAs in the heatmap to the pathways in the table, indicate the pathways predicted to be regulated by the corresponding miRNAs by miRPathDB. Only the miRNAs highlighted in green were analyzed. (D) 5 of 18 miRNAs with the highest importance scores in **Fig. S9B** and **Fig. S9C** were found in the same miRNA cluster on chromosome 7. Density plot shows the methylation levels of derivation samples (thick lines) and later NHSM cultures (p30/50, thin lines), of CpG islands of miRNA cluster region on chromosome seven.

A

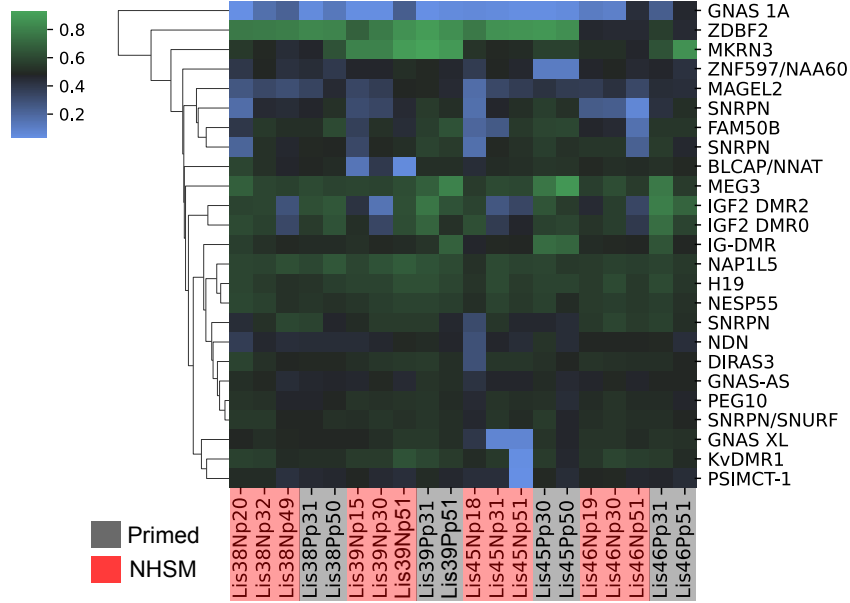

B

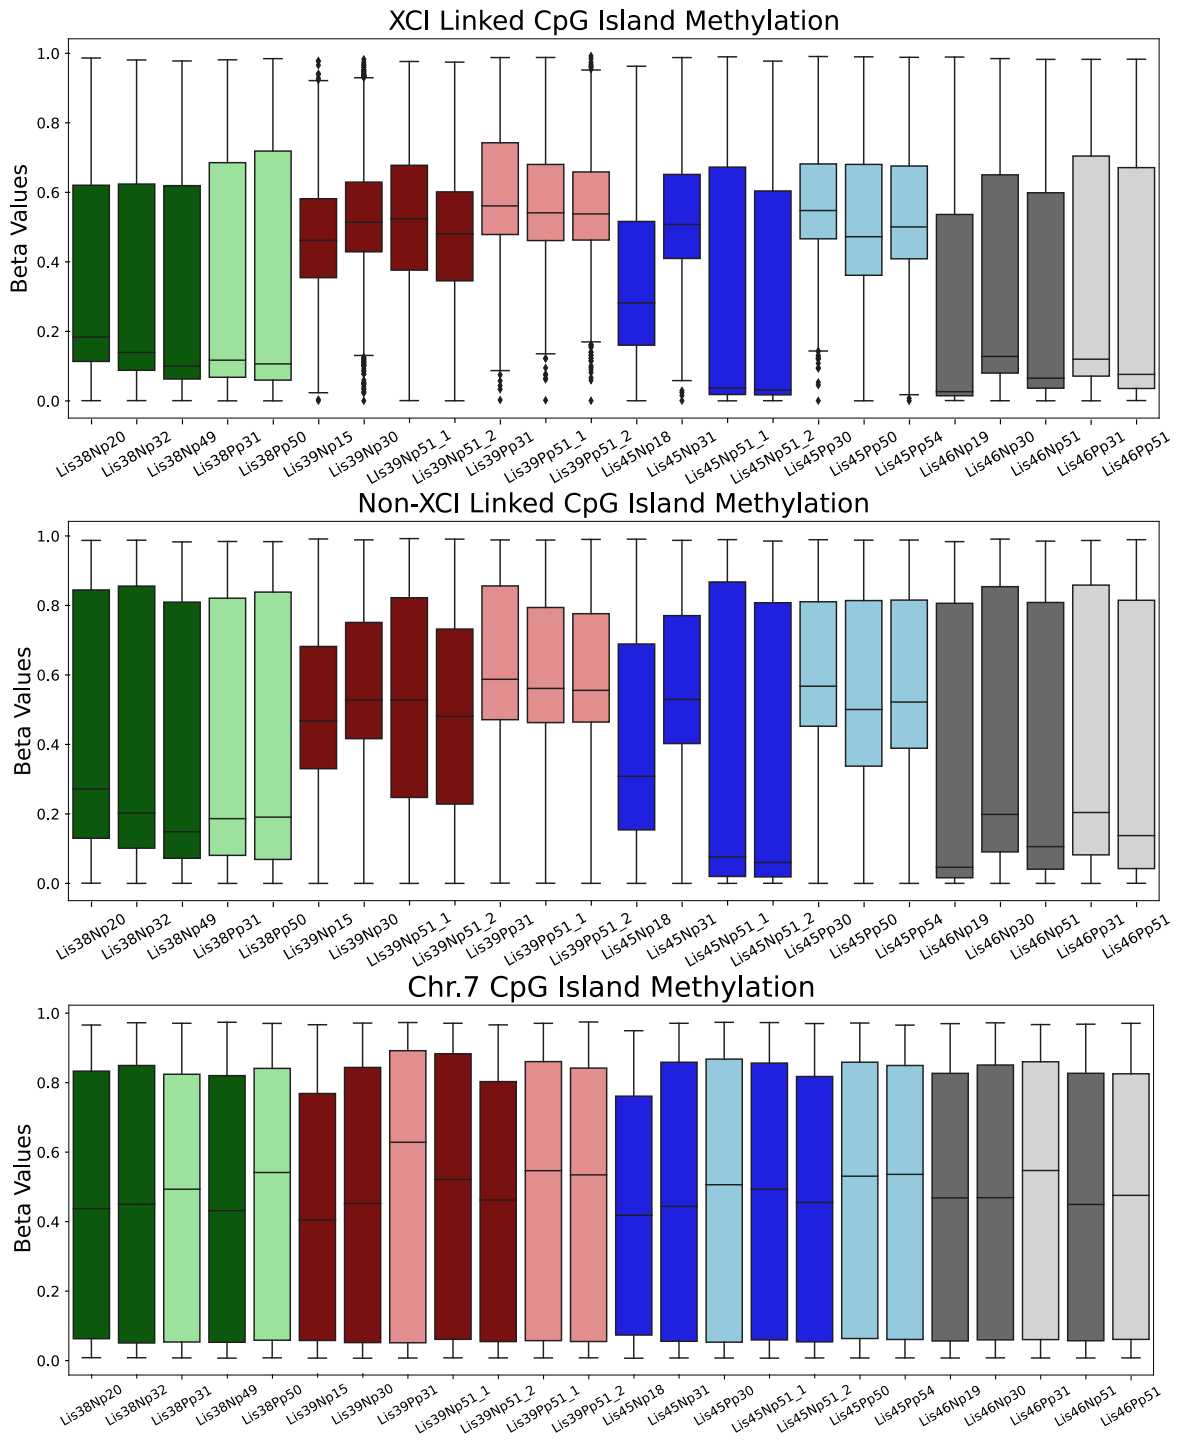



**Figure S10:** Methylation at imprinted and X-Chromosome inactivation sites – related to Figure 6 & 7

(A) Heatmap displaying DNA methylation at regions associated with single-isoform imprinted genes. (B) Methylation levels of the CpG islands associated with X-Chromosome Inactivation (XCI) genes (top boxplot), non-XCI linked genes on the X-chromosome (middle), and with all genes found on chromosome 7 (bottom). Boxes span the top 75th percentile to bottom 25th percentile with the line in the middle of the boxes representing the median. Whiskers contain 95% of the data.

## GO Biological Process 2021

|                                                                                       |                     |
|---------------------------------------------------------------------------------------|---------------------|
| regulation of pathway-restricted SMAD protein phosphorylation (GO:0060393)            | Adj p-value < 0.002 |
| BMP signaling pathway (GO:0030509)                                                    | Adj p-value < 0.002 |
| cellular response to BMP stimulus (GO:0071773)                                        | Adj p-value < 0.002 |
| regulation of macromolecule metabolic process (GO:0060255)                            | Adj p-value < 0.006 |
| positive regulation of pathway-restricted SMAD protein phosphorylation (GO:0010862)   | Adj p-value < 0.02  |
| transmembrane receptor protein serine/threonine kinase signaling pathway (GO:0007178) | Adj p-value < 0.02  |
| regulation of activin receptor signaling pathway (GO:0032925)                         | Adj p-value < 0.04  |
| regulation of interleukin-1 beta production (GO:0032651)                              | Adj p-value < 0.04  |
| regulation of neuroinflammatory response (GO:0150077)                                 | Adj p-value < 0.04  |
| positive regulation of protein phosphorylation (GO:0001934)                           | Adj p-value < 0.04  |

## BioPlanet 2019 Pathways

|                                                    |                    |
|----------------------------------------------------|--------------------|
| NODAL signaling regulation                         | Adj p-value < 0.02 |
| Erythrocyte differentiation pathway                | Adj p-value < 0.02 |
| TGF-beta regulation of skeletal system development | Adj p-value < 0.02 |
| Signaling by NODAL                                 | Adj p-value < 0.02 |
| TGF-beta signaling in development                  | Adj p-value < 0.03 |

**Figure S11:** Gene ontology related to Figure 7

Gene ontology enrichment analysis of genes both hypomethylated and showing higher expression in the NHSM derived (p20) cultures compared to the early (p30) and late (p50) cultures.
